# Supplementary material for: miR-148a-3p inhibits the proliferation and migration of bladder cancer via regulating the expression of ROCK-1
Source: PeerJ journal article supplement (doi:10.7717/peerj.12724), 2022-01-26
Supplement: CCK8.zip [file CCK8.zip]

## Sheet: Magellan Sheet 1
<>	1	2	3	4	5	6	7	8	9	10	11	12
A	0.089	0.099	0.103	0.096	0.095	0.09	0.099	0.093	0.098	0.093	0.088	0.091
B	0.088	0.836	0.997	0.989	0.761	0.951	0.897	0.558	0.553	0.569	0.523	0.109
C	0.085	2.226	2.453	2.107	1.84	1.695	1.922	0.397	0.464	0.421	0.484	0.111
D	0.09	1.207	1.487	1.554	1.013	1.116	1.233	0.509	0.456	0.445	0.448	0.117
E	0.086	1.19	1.391	1.297	1.13	0.945	1.211	0.667	0.716	0.763	0.632	0.099
F	0.086	1.406	1.241	1.301	0.332	0.096	0.495	0.438	0.503	0.543	0.486	0.102
G	0.086	1.658	1.424	1.668	0.324	0.319	0.271	0.422	0.465	0.458	0.445	0.097
H	0.083	0.095	0.1	0.097	0.096	0.093	0.093	0.092	0.093	0.101	0.095	0.11
