# Supplementary material for: miR-148a-3p inhibits the proliferation and migration of bladder cancer via regulating the expression of ROCK-1
Source: PeerJ journal article supplement (doi:10.7717/peerj.12724), 2022-01-26
Supplement: RT-PCR_after_transfection.xlsx [file RT-PCR_after_transfection.xlsx]

## Sheet: Sheet1
	T24						5637						UMUC3
	mimics	inhi	NC	mimics	inhi	inhi NC	mimics	inhi	NC	mimics	inhi	inhi NC	mimics	inhi	NC	mimics	inhi	inhi NC
	1	2	3	4	5	6	7	8	9	10	11	12	13	14	15	16	17	18
A	15	19.71	16.96	16.16	21.71	17.13	16.15	19.18	17.19	14.31	19.47	16.78	15.11	20.9	18.21	15.05	20.74	17.29
B	15.64	19.96	17.04	16.27	21.83	17.19	15.93	19.12	16.99	14.26	19.44	16.97	15.13	20.83	18.33	14.87	21.03	17.37
C	14.99	19.79	17.31	16.28	22.13	17.15	16.06	19.09	16.92	14.29	19.07	16.69	15.01	20.74	18.24	14.9	20.77	16.92
D
E	8.8	9.46	8.89	11.15	9.48	9.17	9.61	8.77	8.99	8.86	8.95	8.8	8.74	8.41	8.63	8.19	8.61	8.16
F	8.73	9.3	8.72	11.42	9.45	8.94	9.54	8.69	8.92		8.95	8.88	8.7	8.29	8.63	8.07	8.59	8.06
G	8.9	9.35	8.8	11.3	9.33	9.1	9.57	8.7	8.88	8.74	8.9	8.96	8.84	8.24	8.6	8.07	8.66	8.11
H
		√	√	√						√	√	√	√		√		√
U6均值	8.81	9.37	8.80333	11.29	9.42	9.07	9.57333	8.72	8.93	8.8	8.93333	8.88	8.76	8.31333	8.62	8.11	8.62	8.11
Δct1（A）	6.19	10.34	8.15667	4.87	12.29	8.06	6.57667	10.46	8.26	5.51	10.5367	7.9	6.35	12.5867	9.59	6.94	12.12	9.18
Δct2（B）	6.83	10.59	8.23667	4.98	12.41	8.12	6.35667	10.4	8.06	5.46	10.5067	8.09	6.37	12.5167	9.71	6.76	12.41	9.26
Δct3（C）	6.18	10.42	8.50667	4.99	12.71	8.08	6.48667	10.37	7.99	5.49	10.1367	7.81	6.25	12.4267	9.62	6.79	12.15	8.81
			8.3			8.08667			8.10333			7.93333			9.64			9.08333
ΔΔct1（A）	-2.11	2.25	-0.143333	-3.43	4.2	-0.03	-1.52333	2.53	0.16	-2.59	2.60667	-0.03	-3.29	3.50667	-0.05	-2.7	3.04	0.1
ΔΔct2（B）	-1.47	2.5	-0.0633333	-3.32	4.32	0.03	-1.74333	2.47	-0.04	-2.64	2.57667	0.16	-3.27	3.43667	0.07	-2.88	3.33	0.18
ΔΔct3（C）	-2.12	2.33	0.206667	-3.31	4.62	-0.01	-1.61333	2.44	-0.11	-2.61	2.20667	-0.12	-3.39	3.34667	-0.02	-2.85	3.07	-0.27
FC1（A）	4.31691	0.210224	1.10445	10.7779	0.0544094	1.02101	2.87454	0.173139	0.895025	6.02099	0.164178	1.02101	9.78112	0.0879808	1.03526	6.49802	0.121582	0.933033
FC2（B）	2.77022	0.176777	1.04488	9.98664	0.0500669	0.97942	3.34808	0.180491	1.02811	6.23332	0.167628	0.895025	9.64646	0.092355	0.952638	7.3615	0.0994421	0.882703
FC3（C）	4.34694	0.198884	0.866537	9.91766	0.0406669	1.00696	3.05958	0.184284	1.07923	6.10504	0.216634	1.08673	10.4831	0.0982999	1.01396	7.21	0.11908	1.20581
		<0.001		<0.001						<0.001	<0.001		<0.001				<0.001
