# Supplementary material for: miR-148a-3p inhibits the proliferation and migration of bladder cancer via regulating the expression of ROCK-1
Source: PeerJ journal article supplement (doi:10.7717/peerj.12724), 2022-01-26
Supplement: The_relative_quantification_of_miR-148a-3p_expression.xlsx [file The_relative_quantification_of_miR-148a-3p_expression.xlsx]

## Sheet: Sheet2
	1T	1N	2T	2N	3T	3N	4T	4N	5T	5N
板1	1	2	3	4	5	6	7	8	9	10	11	12
A	15.57	13.98	15.29	12.69	15.79	13.58	16.52	16.21	14.89	14.99
B	16.08	13.46	15.38	11.98	16.09	13.39	17.01	15.07	14.81	15.87
C	16.29	13.66	15.53	12.74	15.73	13.89	16.6	14.98	14.58	15.28
D
E	16.49	15.08	16.13	14.46	17.22	15.75	17.8	17.59	15.46	17.69
F	16.25	15.71	15.48	13.89	16.14	14.81	18.09	16.82	15.9	16.92
G	15.98	15.35	16.33	14.49	16.8	15.61	17.66	16.89	16.13	17.2
H
	6T	6N	7T	7N	8T	8N	9T	9N	10T	10N
板2	1	2	3	4	5	6	7	8	9	10	11	12
A	15.05	12.66	13.41	14.28	15.26	15.93	15.19	15.92	15.28	18.02
B	14.31	13.13	13.64	15.08	15.28	15.14	14.66	16.73	16.37	18.14
C	15.02	12.88	14.26	15.16	14.19	15.49	15.24	16.46	15.66	17.63
D
E	16.82	15.33	14.11	16.14	16.59	17.56	15.28	17.51	17.29	19.83
F	15.99	13.74	14.98	16.54	15.74	16.78	16.13	19.08	16.28	19.02
G	15.7	15.39	13.96	16.88	16.18	16.96	15.99	18.07	17.16	19.98
H
