# Supplementary material for: miR-148a-3p inhibits the proliferation and migration of bladder cancer via regulating the expression of ROCK-1
Source: PeerJ journal article supplement (doi:10.7717/peerj.12724), 2022-01-26
Supplement: WB.zip [file WB.zip]

## Sheet: Sheet1
	T24					5637
	nc	mimics	inhi nc	inhibior		nc	mimics	inhi nc	inhibior
rock1	29353	17264	29854	104767		41619	4785	31291	40879
	25667	15339	27889	99684		43958	8879	36582	42963
	28996	15428	30015	91809		42816	7594	34110	43289
	28005.3		29252.7			42797.7		33994.3
bcl2	19700	3847	15951	39974		28340	3856	30238	41262
	18717	3280	16897	38510		27119	4123	31599	44217
	19899	3655	14998	36819		26897	4399	32061	42069
	19438.7		15948.7			27452		31299.3
gapdh	28523	33433	32079	34402		39240	41860	40666	41197
	30226	31885	31008	32660		38291	40822	41097	40573
	31068	30491	30058	33281		37781	39815	39860	42009
	29939		31048.3			38437.3		40541
	nc	mimics	inhi nc	inhibior		nc	mimics	inhi nc	inhibior
rock1	1.04813	0.616461	1.02054	3.58141		0.972452	0.111804	0.920486	1.20254
	0.916515	0.547724	0.953372	3.40765		1.0271	0.207463	1.07613	1.26384
	1.03539	0.550902	1.02605	3.13845		1.00042	0.177438	1.00341	1.27343
	0.001		<0.001			<0.001		0.008
bcl2	1.01343	0.197901	1.00013	2.50636		1.03235	0.140463	0.966101	1.31832
	0.962858	0.168733	1.05944	2.41457		0.98787	0.150189	1.00958	1.41273
	1.02366	0.188024	0.940372	2.30855		0.979783	0.160243	1.02435	1.3441
	<0.001		<0.001			<0.001		<0.001
gapdh	0.952704	1.1167	1.03321	1.10803		1.02089	1.08905	1.00308	1.01618
	1.00959	1.065	0.998712	1.05192		0.996202	1.06205	1.01371	1.00079
	1.03771	1.01844	0.968114	1.07192		0.982933	1.03585	0.983202	1.03621
	0.156		0.169			0.59		0.264
